# Supplementary material for: Erucin Exerts Cardioprotective Effects on Ischemia/Reperfusion Injury through the Modulation of mitoKATP Channels
Source: MDPI journal article supplement (doi:10.3390/biomedicines11123281), 2023-12-12
Supplement: s1 [file s1]

# Supporting Information

## Erucin Exerts Cardioprotective Effects on Ischemia/Reperfusion Injury through the Modulation of mitoKATP Channels

Lorenzo Flori <sup>1</sup>, Rosangela Montanaro <sup>2</sup>, Eleonora Pagnotta <sup>3</sup>, Luisa Ugolini <sup>3</sup>, Laura Righetti <sup>3</sup>, Alma Martelli <sup>1,4,5</sup>, Lorenzo Di Cesare Mannelli <sup>6</sup>, Carla Ghelardini <sup>6</sup>, Vincenzo Brancaleone <sup>2</sup>, Lara Testai <sup>1,4,5,\*</sup> and Vincenzo Calderone <sup>1,4,5</sup>

Department of Pharmacy, University of Pisa, 56120-Pisa, Italy; lorenzo.flori@farm.unipi.it; alma.martelli@unipi.it; lara.testai@unipi.it; vincenzo.calderone@unipi.it.

<sup>2</sup> Department of Science, University of Basilicata, 85100, Potenza, Italy; vincenzo.brancaleone@unibas.it; rosangela.montanaro@unibas.it.

<sup>3</sup> CREA-Council for Agricultural Research and Economics, Research Centre for Cereal and Industrial Crops, via di Corticella 133, 40128 Bologna, Italy; eleonora.pagnotta@crea.gov.it; luisa.ugolini@crea.gov.it; laura.righetti@crea.gov.it.

<sup>4</sup> Interdepartmental Research Center Nutrafood "Nutraceuticals and Food for Health", University of Pisa, Pisa, Italy.

<sup>5</sup> Interdepartmental Research Centre of Ageing Biology and Pathology, University of Pisa, Pisa, Italy

<sup>6</sup> Department of Neuroscience, Psychology, Drug Research and Child Health-Neurofarba-Pharmacology and Toxicology Section, University of Florence, Florence, Italy; lorenzo.mannelli@unifi.it; carla.ghelardini@unifi.it

\* Correspondence: lara.testai@unipi.it (L.T.)

**Figure S1.** Time-course recording of the fluorescence emitted after the addition of thallium ion into suspended cardiac mitochondria.

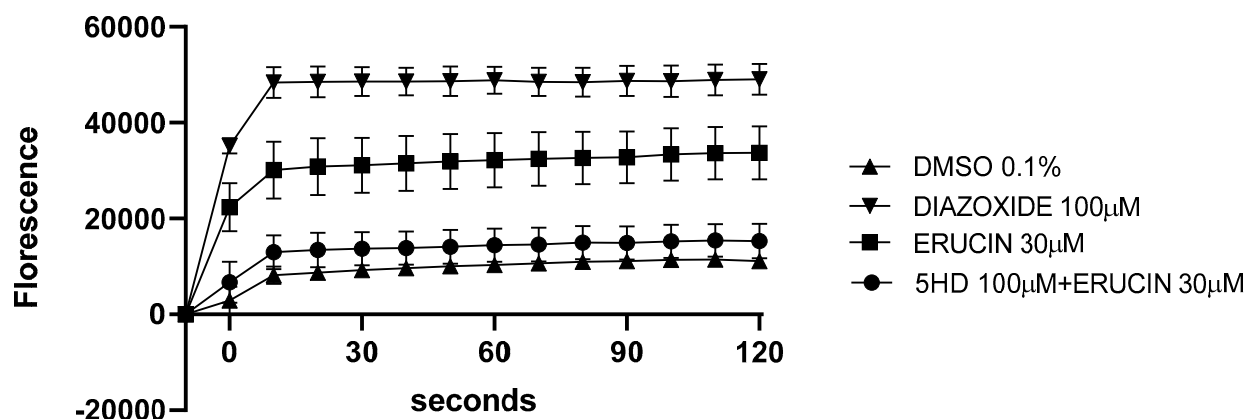

The increase in fluorescence (due to the entry of  $Tl^{+}$  into the matrix, through the potassium channels) was monitored for 120 seconds by EnSpire multi-plate reader; then the area under curve (AUC) was calculated for different treatments and subtracted the AUC obtained with vehicle. Diazoxide is considered as a positive control for the activation of mitoKATP channel, and established equal to 100%. The fluorescence emitted after treatment with erucin 30 microM or erucin 30 microM+5HD 100 microM was expressed as percentage of diazoxide.
